Abstract

# MED31/437: A Web-based Diabetes Management System: DiabNet

N Zhao; A Roudsari; E Carson

City University, London, UK

## Abstract

**Introduction:** A web-based system (DiabNet) was developed to provide instant access to the Electronic Diabetes Records (EDR) for end-users, and real-time information for healthcare professionals to facilitate their decision-making. It integrates portable glucometer, handheld computer, mobile phone and Internet access as a combined telecommunication and mobile computing solution for diabetes management. Methods: Active Server Pages (ASP) embedded with advanced ActiveX controls and VBScript were developed to allow remote data upload, retrieval and interpretation. Some advisory and Internet-based learning features, together with a video teleconferencing component make DiabNet web site an informative platform for Web-consultation.

**Results:** The evaluation of the system is being implemented among several UK Internet diabetes discussion groups and the Diabetes Day Centre at the Guy's & St. Thomas' Hospital. Many positive feedback are received from the web site demonstrating DiabNet is an advanced web-based diabetes management system which can help patients to keep closer control of self-monitoring blood glucose remotely, and is an integrated diabetes information resource that offers telemedicine knowledge in diabetes management.

**Discussion:** In summary, DiabNet introduces an innovative online diabetes management concept, such as online appointment and consultation, to enable users to access diabetes management information without time and location limitation and security concerns.

(*J Med Internet Res* 1999;1(suppl1):e68) doi: [10.2196/jmir.1.suppl1.e68](https://doi.org/10.2196/jmir.1.suppl1.e68)

## KEYWORDS

Web-based; ActiveX ; Diabetes Management; Decision-Making; Mobile Computing

###Reviewer names will be inserted here### published 19.09.99.

Please cite as:

Zhao N, Roudsari A, Carson E

MED31/437: A Web-based Diabetes Management System: DiabNet

*J Med Internet Res* 1999;1(suppl1):e68

URL: <http://www.jmir.org/1999/suppl1/e68/>

doi: [10.2196/jmir.1.suppl1.e68](https://doi.org/10.2196/jmir.1.suppl1.e68)

PMID:

Except where otherwise noted, articles published in the Journal of Medical Internet Research are distributed under the terms of the Creative Commons Attribution License (<http://www.creativecommons.org/licenses/by/2.0/>), which permits unrestricted use, distribution, and reproduction in any medium, provided the original work is properly cited.
